# Supplementary material
Source: PubMed Central journal article supplement (PMC6156295)
Supplement: zjm999096127s1.pdf [file zjm999096127s1.pdf]

**Table S1.** BmGPAC assay on plasma from mice before or after inoculation with  $10^6$  *B. microti* -infected RBCs. The data represent average of 5 mice in each group. SW: Swiss Webster, M: male mice, F: female mice. PB: Plasma 4 days before parasite inoculation; D0: plasma collected 6h post-inoculation; D4 -D42: plasma collected at different days post-inoculation. TX: Oral administration of ELQ334 (10 mg/kg) + atovaquone (10 mg/kg) from days 4 to 11.

| Mice group     | Day of plasma collection and concentration of BmGPI12 (pg/ $\mu$ l) |      |      |      |      |      |      |      |      |      |      |     |
|----------------|---------------------------------------------------------------------|------|------|------|------|------|------|------|------|------|------|-----|
|                | PB                                                                  | D0   | D4   | D7   | D11  | D14  | D18  | D21  | D25  | D28  | D31  | D42 |
| SW-M           | 0                                                                   | 24.4 | 31.2 | 36.4 | 44.1 | 36.6 | 33.8 | 30.6 | 28.2 | 19.1 | 16.4 | 1.5 |
| SW-F           | 0                                                                   | 20.8 | 28.9 | 32.5 | 36.5 | 43.4 | 39.4 | 35.6 | 32.7 | 19.4 | 8.3  | 0.8 |
| BALB/c- M      | 0                                                                   | 25   | 34   | 36   | 39   | 40   | 37   | 34   | 32   | 30   | 8    | 2   |
| BALB/c- F + TX | 0                                                                   | 27   | 32   | 38   | 62   | 33   | 22   | 15   | 13   | 11   | 3    | 0   |
| BALB/c -F      | 0                                                                   | 25   | 29   | 34   | 36   | 35   | 33   | 32   | 29   | 15   | 10   | 3   |

**Table S2.** Real time PCR Ct values on DNA isolated from mice before or after inoculation with  $10^6$  *B. microti* -infected RBCs. SW: Swiss Webster, M: male mice, F: female mice. D0: Blood collected 6h post-inoculation; D4 -D42: Blood collected at different days post-inoculation. TX: Oral administration of ELQ334 (10 mg/kg) + atovaquone (10 mg/kg) from days 4 to 11. The data represent average of 5 mice in each group.

| Mice Group    | Day of plasma collection and RT-PCR Ct values |    |    |     |     |     |     |     |     |     |     |
|---------------|-----------------------------------------------|----|----|-----|-----|-----|-----|-----|-----|-----|-----|
|               | D0                                            | D4 | D7 | D11 | D14 | D18 | D21 | D25 | D28 | D31 | D42 |
| SW-M          | 41                                            | 36 | 31 | 22  | 22  | 22  | 21  | 25  | 30  | 30  | 29  |
| SW-F          | 34                                            | 32 | 24 | 20  | 19  | 25  | 23  | 25  | 29  | 32  | 28  |
| BALB/c- M     | 38                                            | 31 | 25 | 22  | 24  | 27  | 30  | 32  | 29  | 33  | 31  |
| BALB/c- F +TX | 38                                            | 34 | 26 | 24  | 30  | 35  | 39  | 38  | 40  | 43  | 39  |
| BALB/c -F     | 42                                            | 32 | 30 | 27  | 22  | 22  | 26  | 32  | 31  | 31  | 30  |

**Table S3.** Parasitemia for each experimentally infected mouse following inoculation of Swiss-Webster (SW) mice with  $10^6$  *B. microti* -infected RBCs. Parasitemia is given as a percentage of infected RBCs from an average of 5000 RBCs counted.

| Day of collection | Parasitemia for each mouse in % |       |       |       |       |       |       |       |       |
|-------------------|---------------------------------|-------|-------|-------|-------|-------|-------|-------|-------|
|                   | SW -M1                          | SW-M2 | SW-M3 | SW-M4 | SW-F1 | SW-F2 | SW-F3 | SW-F4 | SW-F5 |
| <b>D4</b>         | 0.03                            | 0.05  | 0.12  | 0.06  | 0.117 | 0.07  | 0.1   | 0.07  | 0     |
| <b>D7</b>         | 1.22                            | 0.17  | 0.23  | 0.52  | 0.38  | 0.56  | 0.3   | 0.54  | 0.6   |
| <b>D11</b>        | 50                              | 21.11 | 20    | 20.8  | 12.7  | 12.6  | 9     | 20    | 13.8  |
| <b>D14</b>        | 14.33                           | 12    | 15    | 31.87 | 55.7  | 50    | 53.2  | 12    | 36    |
| <b>D18</b>        | 2.03                            | 3.21  | 7.52  | 1.16  | 4.47  | 27    | 0.28  | 8.3   | 15.48 |
| <b>D21</b>        | 0.73                            | 1.21  | 7.5   | 1.52  | 1.52  | 2.28  | 0     | 6.28  | 11.42 |
| <b>D25</b>        | 0.25                            | 0     | 7.12  | 0.16  | 0.16  | 1.02  | 0     | 0.11  | 0.66  |
| <b>D28</b>        | 0                               | 0     | 1.88  | 0     | 0     | 0     | 0     | 0     | 0     |
| <b>D31</b>        | 0                               | 0     | 0     | 0.03  | 0     | 0     | 0     | 0     | 0     |
| <b>D35</b>        | 0                               | 0     | 0     | 0     | 0     | 0     | 0     | 0     | 0     |

**Table S4.** BmGPAC assay results for IFA negative and positive sera from wild mice.

| Wild Mice | BmGPI12 concentration (pg/ $\mu$ l) |              |
|-----------|-------------------------------------|--------------|
|           | IFA positive                        | IFA negative |
| 1         | 3.29                                | 0            |
| 2         | 17.77                               | 0            |
| 3         | 17.61                               | 0            |
| 4         | 20.63                               | 0            |
| 5         | 48.23                               | 0            |
| 6         | 7.9                                 | 0.34         |
| 7         | 1.58                                | 0            |
| 8         | 1.28                                | 0            |
| 9         | 20.44                               | 0            |
| 10        | 0                                   | 0            |
| 11        | 5.13                                | 0            |
| 12        | 17.08                               | 0            |
| 13        | 23.79                               | 0            |
| 14        | 14.19                               | 0            |
| 15        | 24.03                               | 0            |
| 16        | 15.88                               | 0            |
| 17        | 23.66                               | 0            |
| 18        | 17.67                               | 0            |
| 19        | 21.05                               | 0            |
| 20        | 21.89                               | 0            |
| 21        | 66.18                               | 0.52         |
| 22        | 44.13                               | 0            |
| 23        | 83.87                               | 2.65         |
| 24        | 44.9                                | 0            |
| 25        | 35.99                               | 0            |
| 26        | 36.53                               | 0            |
| 27        | 24.12                               | 0            |
| 28        | 28.9                                | 0.88         |
| 29        | 36.09                               | 0            |
| 30        | 17.99                               | 0            |
| 31        | 59.03                               | 0            |
| 32        | 37.76                               | 0            |
| 33        | 42.5                                | 0.41         |
| 34        | 49.02                               | 0            |

| Wild Mice | BmGPI12 concentration (pg/μl) |              |
|-----------|-------------------------------|--------------|
|           | IFA positive                  | IFA negative |
| 35        | 14.63                         | 0            |
| 36        | 54.79                         | 0            |
| 37        | 40.29                         | 0            |
| 38        | 51.71                         | 0            |
| 39        | 40.83                         | 0            |
| 40        | 41.41                         |              |
| 41        | 8.7                           |              |
| 42        | 8.69                          |              |
| 43        | 6.39                          |              |
| 44        | 22.21                         |              |
